# Supplementary material for: Differential Effects of sEH Inhibitors on the Proliferation and Migration of Vascular Smooth Muscle Cells
Source: Int J Mol Sci. 2017 Dec 11;18(12):2683. doi: 10.3390/ijms18122683 (PMC5751285; doi:10.3390/ijms18122683)
Supplement: Supplementary file 1 [file ijms-18-02683-s001.pdf]

**A)**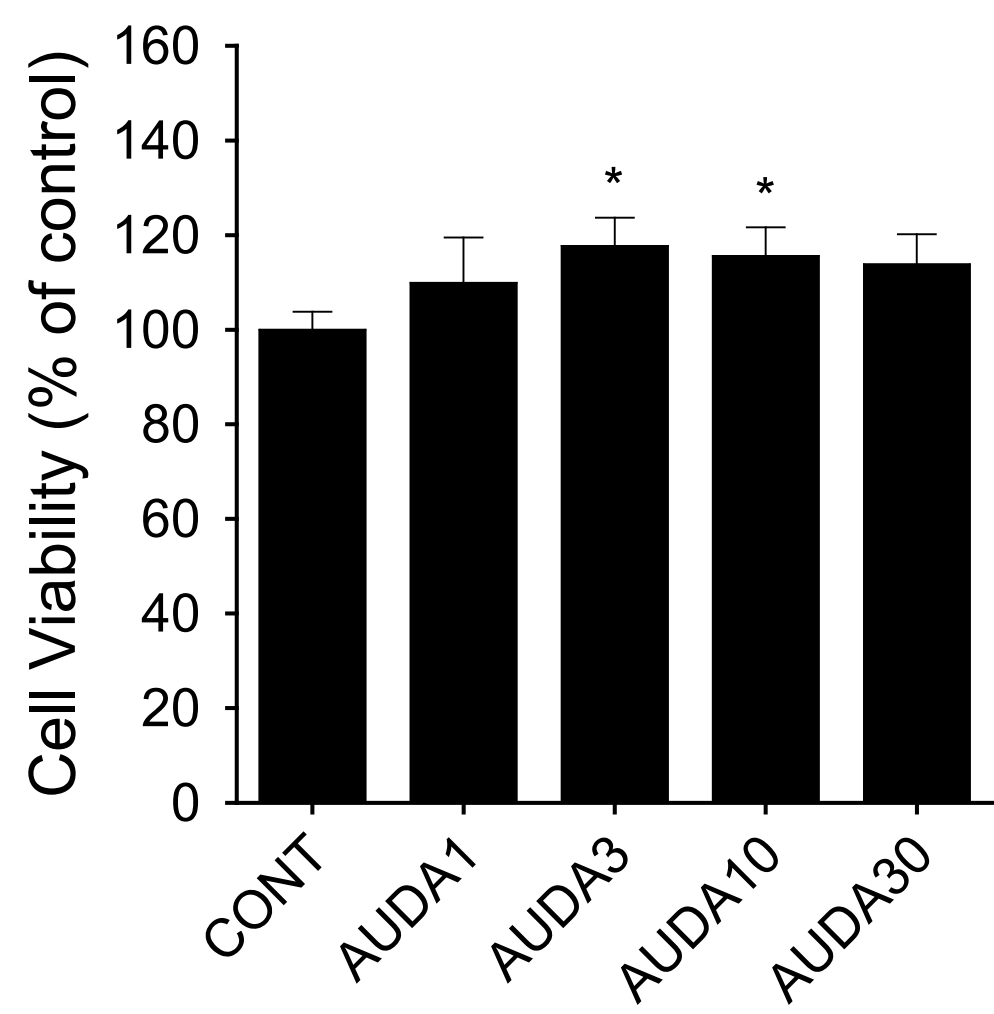**B)**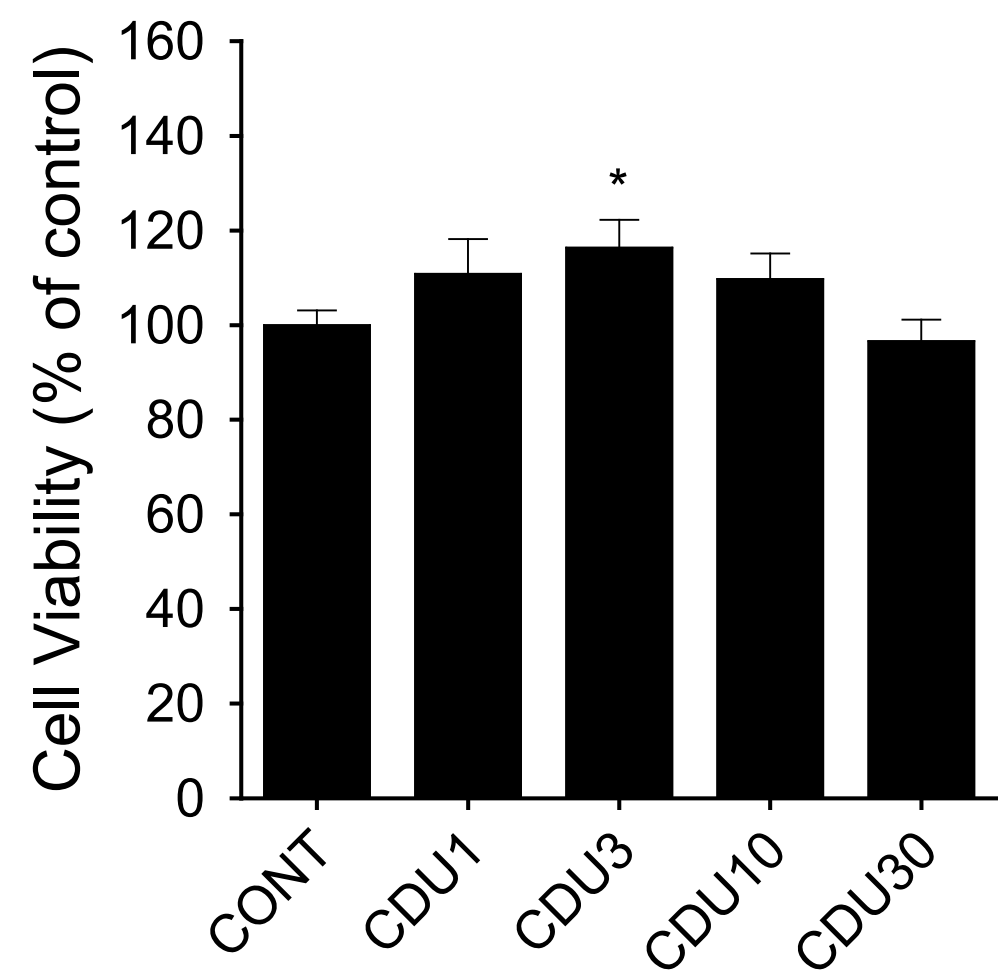

**Figure S1.** AUDA and CDU are not toxic to rat VSMCs. **(A, B)** Effects of AUDA **(A)** and CDU **(B)** on rat VSMC viability. Rat VSMC were treated with vehicle, AUDA (1 to 30  $\mu\text{g/mL}$ ) or CDU (1 to 30  $\mu\text{M}$ ) for 48 h. VSMC viability was measured by Sulforhodamine B assay. Statistical significance is indicated as \* $p < 0.05$  vs control.
